# Supplementary material
Source: PubMed Central journal article supplement (PMC5575963)
Supplement: NIHMS892628-supplement-Supplemental_Table_I_and_Supplemental_Table_II.pdf [file NIHMS892628-supplement-Supplemental_Table_I_and_Supplemental_Table_II.pdf]

SUPPLEMENTAL MATERIAL

|                         |                                            | Time between Site Approval and Authorization to Randomize (“Green Light”) |         | Time Between Authorization to Randomize and First Patient |         |
|-------------------------|--------------------------------------------|---------------------------------------------------------------------------|---------|-----------------------------------------------------------|---------|
|                         |                                            | Hazard Ratio (95% CI)                                                     | P-Value | Hazard Ratio (95% CI)                                     | P-Value |
| PI Specialty            | Interventional Radiology or Neuroradiology | 0.89<br>(0.36 – 2.20)                                                     | 0.62    | 0.50<br>(0.17 – 1.43)                                     | 0.72    |
|                         | Neurology                                  | 0.93<br>(0.58 – 1.50)                                                     |         | 0.79<br>(0.44 – 1.42)                                     |         |
|                         | Neurosurgery                               | 0.51<br>(0.23 – 1.16)                                                     |         | 0.93<br>(0.40 – 2.14)                                     |         |
|                         | Vascular Surgery                           | 0.94<br>(0.60 – 1.48)                                                     |         | 0.94<br>(0.55 – 1.58)                                     |         |
|                         | Cardiology                                 | 1.00<br>(ref)                                                             |         | 1.00<br>(ref)                                             |         |
| Site Type               | Private Hospital                           | 1.23<br>(0.82 – 1.85)                                                     | 0.44    | 0.96<br>(0.58 – 1.59)                                     | 0.15    |
|                         | Private office                             | 1.49<br>(0.87 – 2.57)                                                     |         | 1.77<br>(0.99 – 3.15)                                     |         |
|                         | VA Medical Center                          | 0.92<br>(0.42 – 2.01)                                                     |         | 1.71<br>(0.72 – 4.03)                                     |         |
|                         | Academic                                   | 1.00<br>(ref)                                                             |         | 1.00<br>(ref)                                             |         |
| Affiliates              | Yes                                        | 1.28<br>(0.85 – 1.92)                                                     | 0.23    | 0.91<br>(0.56 – 1.48)                                     | 0.71    |
|                         | No                                         | 1.00<br>(ref)                                                             |         | 1.00<br>(ref)                                             |         |
| StrokeNET participation | StrokeNET                                  | 1.27<br>(0.88 – 1.85)                                                     | 0.21    | 0.84<br>(0.55 – 1.30)                                     | 0.43    |
|                         | Non-StrokeNET                              | 1.00                                                                      |         | 1.00                                                      |         |

SUPPLEMENTAL MATERIAL

|                                      |          |                       |      |                       |      |
|--------------------------------------|----------|-----------------------|------|-----------------------|------|
|                                      |          | (ref)                 |      | (ref)                 |      |
| Use of the Central IRB               | Yes      | 1.25<br>(0.87 – 1.79) | 0.23 | 0.88<br>(0.58 – 1.34) | 0.56 |
|                                      | No       | 1.00<br>(ref)         |      | 1.00<br>(ref)         |      |
| Staff Complement                     | Partial  | 0.73<br>(0.43 – 1.23) | 0.24 | 1.47<br>(0.79 – 2.72) | 0.22 |
|                                      | Full     | 1.00<br>(ref)         |      | 1.00<br>(ref)         |      |
| Number of CEA                        | <10      | 1.12<br>(0.54 – 2.34) | 0.83 | 1.50<br>(0.68 – 3.30) | 0.45 |
|                                      | 10-25    | 1.33<br>(0.71 – 2.52) |      | 0.57<br>(0.23 – 1.43) |      |
|                                      | 25-50    | 1.10<br>(0.72 – 1.69) |      | 1.00<br>(0.60 – 1.67) |      |
|                                      | >50      | 1.00<br>(ref)         |      | 1.00<br>(ref)         |      |
| Number of CAS                        | <10      | 1.35<br>(0.75 – 2.44) | 0.23 | 0.81<br>(0.40 – 1.62) | 0.84 |
|                                      | 10-25    | 1.34<br>(0.78 – 2.31) |      | 0.96<br>(0.53 – 1.75) |      |
|                                      | 25-50    | 1.75<br>(1.02 – 3.02) |      | 0.80<br>(0.43 – 1.48) |      |
|                                      | >50      | 1.00<br>(ref)         |      | 1.00<br>(ref)         |      |
| Approval by site selection committee | CAS only | 0.40<br>(0.15 – 1.10) | 0.21 | 1.96<br>(0.79 – 4.86) | 0.29 |
|                                      | CEA only | 0.99<br>(0.48 – 2.04) |      | 1.45<br>(0.52 – 4.03) |      |
|                                      | Both     | 1.00<br>(ref)         |      | 1.00<br>(ref)         |      |

SUPPLEMENTAL MATERIAL

|                                             |              |                       |       |                       |       |
|---------------------------------------------|--------------|-----------------------|-------|-----------------------|-------|
| Green light authorization for randomization | CAS only     | Not Applicable        |       | 0.92<br>(0.42 – 2.02) | 0.014 |
|                                             | CEA only     |                       |       | 0.47<br>(0.28 – 0.80) |       |
|                                             | Both         |                       |       | 1.00<br>(ref)         |       |
| CREST Participation                         | Top Half     | 0.59<br>(0.38 – 0.91) | 0.055 | 1.24<br>(0.77 – 2.02) | 0.46  |
|                                             | Bottom Half  | 0.88<br>(0.56 – 1.38) |       | 0.88<br>(0.52 – 1.50) |       |
|                                             | Not in CREST | 1.00<br>(ref)         |       | 1.00<br>(ref)         |       |

Supplemental Table I: Univariate hazard ratio for time between site approval by the site selection committee and authorization to randomize, and between authorization to randomize and the recruitment of the first patient. Note that hazard ratios greater than 1.00 represent evidence of a shorter time to authorization or randomization.

SUPPLEMENTAL MATERIAL

|                  | Level   | Univariate          |                                 |                            |         | Multivariable              |         |
|------------------|---------|---------------------|---------------------------------|----------------------------|---------|----------------------------|---------|
|                  |         | Recruit / Clin Mths | Recruit Rate per Month (95% CI) | Recruitment Ratio (95% CI) | P-Value | Recruitment Ratio (95% CI) | P-Value |
| Affiliates       | Yes     | 145<br>508          | 0.29<br>(0.24 – 0.34)           | 1.18<br>(0.96 – 1.44)      | 0.11    | 0.90<br>(0.68 – 1.19)      | 0.47    |
|                  | No      | 292<br>1,204        | 0.24<br>(0.22 – 0.27)           | 1.00<br>(ref)              |         | 1.00<br>(ref)              |         |
| CIRB Use         | Yes     | 220<br>903          | 0.24<br>(0.21 – 0.28)           | 0.91<br>(0.75 – 1.10)      | 0.32    | 1.19<br>(0.93 – 1.53)      | 0.16    |
|                  | No      | 217<br>809          | 0.27<br>(0.23 – 0.31)           | 1.00<br>(ref)              |         | 1.00<br>(ref)              |         |
| Staff Complement | Partial | 55<br>212           | 0.26<br>(0.20 – 0.34)           | 1.02<br>(0.77 – 1.35)      | 0.90    | 0.71<br>(0.45 – 1.10)      | 0.12    |
|                  | Full    | 382<br>1,501        | 0.25<br>(0.23 – 0.28)           | 1.00<br>(ref)              |         | 1.00<br>(ref)              |         |

Supplemental Table II: Statistically insignificant (either univariate or multivariable) predictors of number the number of patients recruited per site per month. Data by columns are: 1) number of patients recruited and cumulative number of recruitment months, 2) estimated recruitment rate per month (with 95% CI), 3) relative recruitment rates (with 95% CI), 4) univariate test of differences in recruitment rates, 5) multivariable relative recruitment rates, and 6) multivariable test of differences in recruitment rates. Analysis was also performed for whether the site had affiliates recruitment partners and whether the site was at full staff complement, with neither of these factors being significant ( $p > 0.1$ ) in either univariate or multivariable analysis (these factors also remain in the multivariable model).
